# Supplementary material for: The Impact of Sublingual Atropine Eyedrops on Salivary Flow in 7–17-year-old Children During Routine Dental Procedures: a Randomized Controlled Trial
Source: Research Square preprint supplement (doi:10.21203/rs.3.rs-1650583/v1), 2022-05-24
Supplement: Supplementary file 1 [file c772ad976f700939df06acf5.docx]

##
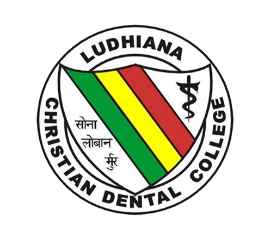


## DEPARTMENT OF PEDODONTICS AND PREVENTIVE DENTISTRY

## CHRISTIAN DENTAL COLLEGE, LUDHIANA

This informed consent is for parents of children who presented to the Out Patient Department of Pedodontics and Preventive Dentistry and agree to be a part of the Clinical Trial titled, **“EVALUATION OF ALTERATION IN SALIVARY FLOW FOLLOWING ADMINISTRATION OF ATROPINE DROPS SUBLINGUALLY.”**

Principal Investigator: DR. SHANNON SAMUEL

Organization: CHRISTIAN DENTAL COLLEGE

Study Supervisor: DR. SHAILA

**INTRODUCTION**

I am, Dr. Shannon Samuel, IIIrd year Resident in Department of Pedodontics and Preventive Dentistry and along with my Guide, Dr. Shaila and co-guide Dr. Gagandeep, we are conducting a study to check for decrease in salivary flow with the administration of atropine drops in children. I am going to give you information and invite you to be part of this research. You do not have to decide today whether you will participate in the research. Before you decide, you can talk to anyone you feel comfortable with about the research.

There may be some words that you do not understand. Please ask me to stop as we go through the information and I will take time to explain. If you have questions later, you can ask them of me or the study supervisor.

**PURPOSE OF RESEARCH**

We, as Dental Practitioner face saliva control as one of our biggest challenges that often becomes an obstacle to ideal and sound treatment. This problem is magnified a manifold when working with children. In the recent times with the advent of new infections saliva has also become a portal for transmission of various diseases. Keeping all this in mind the present study aims to make the salivary flow manageable and improve quality of treatment for the period of the procedure.

**TYPE OF RESEARCH INTERVENTION**

This study will involve administration of some oral drops into your child’s mouth and collection of their saliva into a test tube passively 3 times for a period of 90mins.

**SELECTION OF PARTICIPANTS**

We are inviting all children undergoing elective procedures in our department between the ages of 7-18years who do not have any underlying medical conditions or known allergies.

**VOLUNTARY PARTICIPATION**

Your participation in this research is entirely voluntary. It is your choice whether to allow your ward to participate or not. Whether you choose to participate or not, all the services you receive at this clinic will continue and nothing will change. You may change your mind later and stop participating even if you agreed earlier.

**INFORMATION ON ATROPINE**

Pharmacologic classification: anticholinergic, belladonna alkaloid

Therapeutic classification: antiarrhythmic, vagolytic

A sublingual administration of atropine sulphate 1% w/v drops as per the dose range, 0.01-0.02 mg/kg of body weight.

Anticholinergics on principle reduce the volume of salivary output by reversibly blocking cholinergic muscarinic receptors at this site. Thus, cholinergic muscarinic receptor antagonists such as atropine, are well documented to be used to treat glandular hypersecretion.

It has been tested before with people to decease salivary flow. We now want to test the drug on children for dental setting. This second research is called a "phase 2" trial.

The drug Atropine Sulfate is made by Jawa Company. You should know that it has a few side effects. Some of the side effects in the current form and dosage can be headache, restlessness, ataxia, disorientation, tachycardia, dry mouth, thirst, constipation, severe allergic reactions, including anaphylaxis and urticaria.

**There is no published evidence of any of the above symptoms in the dose and mode of administration of this drug in any study so far.**

Some participants in the research will not be given the drug which we are testing. Instead, they will be given distilled water drops. There is no risk associated with that and no known problems.

**PROCEDURES AND PROTOCOL**

1. UNFAMILIAR PROCEDURES

As there is currently very little research on the extent of salivary flow control that can be applied in dentistry especially in children the drug we will be testing for its role in decreasing saliva in the mouth. For this reason, the drops available in the market will be used to test this hypothesis. To do this, we will put people taking part in this research into two groups. The groups are selected by chance, by computer generated randomization.

Participants in one group will be given the test drug while participants in the other group will be given distilled water drops. It is important that neither you nor we know which of the two drugs you are given. This information will be in our files, but we will not look at these files until after the research is finished. This is the best way we have for testing without being influenced by what we think, or hope might happen. We will then compare which of the two has the best results.

The healthcare workers will be looking after you and the other participants very carefully during the study. If we are concerned about what the drug is doing, we will intervene and stop the trial. If there is anything you are concerned about or that is bothering, you about the research please talk to me or one of the other researchers.

1. PLACEBO

A placebo or inactive medicine looks like real medicine, but it is not. It is a dummy or pretend medicine. It has no effect on a person because it has no real medicine in it. Sometimes when we want to know whether a new medicine is good, we give some people the new medicine and some people the pretend or dummy medicine.

1. PROCEDURE

To confirm the decrease in saliva flow, saliva will be collected in a test tube. The guidelines say that the sample must be taken by passively drooling into the test tube for 1 minute. This will be repeated 3 times in a 90minute interval. Before, during and after the procedure has finished.

1. DESCRIPTION OF PROCUDURE

On your visit to the department, your temperature will be screened as per the national guidelines during COVID-19 pandemic. Once clearance has been taken the child will be asked to sit on the chair and passively drool into a test tube. We will also ask you a few questions about your general health and measure the blood pressure and pulse and how much you weigh. The child will also be asked to chew a piece of gum following which saliva will again be collected into the test tube.

1. DURATION

This study will take place for a period of 90minutes on a single visit and you will not be asked to bring the child again for the present trial.

**CONFIDENTIALITY**

The information that we collect from this research project will be kept confidential. Information about you that will be collected during the research will be put away and no-one, but the researchers will be able to see it. Any information about your child will have a number on it instead of their name. Only the researchers will know what your number is and we will lock that information up with a lock and key. It will not be shared with or given to anyone except Dr. Shaila and the institute.

**SHARING THE RESULTS**

The knowledge that we get from doing this research will be shared with you before it is made widely available to the public. Confidential information will not be shared.

**RIGHT TO REFUSE OR WITHDRAW**

You do not have to take part in this research if you do not wish to do so. You may also stop participating in the research at any time you choose. It is your choice and all of your rights will still be respected.

**WHO TO CONTACT**

If you have any questions you may ask them now or later, even after the study has started. If you wish to ask questions later, you may contact any of the following: Dr. shannon Samuel, Phone No. 07224917778.

This proposal has been reviewed and approved by INSTITUTE ETHICS COMMITTEE, which is a committee whose task it is to make sure that research participants are protected from harm. If you wish to find about more about the ethics committee, you can contact Dr. Shaila (Professor, Dept. of Pedodontics and preventive Dentistry and Vice Principal CDC, Ludhiana).

**
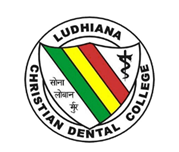
**

**I have read the foregoing information, or it has been read to me. I have had the opportunity to ask questions about it and any questions that I have asked have been answered to my satisfaction. I consent voluntarily to participate as a participant in this research.**

**Name of Participant __________________**

**Signature of Participant/parent __________________**

**Date ___________________**

**Day/month/year**

**If illiterate**

**I have witnessed the accurate reading of the consent form to the potential participant, and the individual has had the opportunity to ask questions. I confirm that the individual has given consent freely.**

**Print name of witness ___________________ AND Thumb print of participant**

**Signature of witness ____________________**

**Date ________________________**

**Day/month/year**

**Statement by the researcher/person taking consent**

**I have accurately read out the information sheet to the potential participant, and to the best of my ability made sure that the participant understands that the following will be done:**

**1.**

**2.**

**3.**

**I confirm that the participant was given an opportunity to ask questions about the study, and all the questions asked by the participant have been answered correctly and to the best of my ability. I confirm that the individual has not been coerced into giving consent, and the consent has been given freely and voluntarily.**

**A copy of this ICF has been provided to the participant.**

**Print Name of Researcher/person taking the consent________________________**

**Signature of Researcher /person taking the consent__________________________**

**Date __________________________**

**Day/month/year**
